# Supplementary material for: YY1 is regulated by ALKBH5-mediated m6A modification and promotes autophagy and cancer progression through targeting ATG4B
Source: publisher site journal article supplement (doi:10.18632/aging.205037), 2023-09-18
Supplement: Supplementary file [file aging-v15i18-205037-supplementary-material-SD2.pdf]

## SUPPLEMENTARY TABLES

**Supplementary Table 1. Primer sets used for qPCR, RT-PCR.**

| Primer set 1 | Primers | Sequence                       | Product size (bp) |
|--------------|---------|--------------------------------|-------------------|
| ACTB         | Forward | 5'-TGCCCATCTACGAGGGGTATG-3'    | 156               |
|              | Reverse | 5'-TCTCCTTAATGTCACGCACGATTT-3' |                   |
| ALKBH5       | Forward | 5'-GTTCAAGCCTATTCGGGTGT-3'     | 204               |
|              | Reverse | 5'-ACGGAGCTGCTCAGGGACT-3'      |                   |
| ATG4B        | Forward | 5'-TCAGAGCCCCTTTGGATA-3'       | 283               |
|              | Reverse | 5'-CGATGAATGCGTTGAGGAC-3'      |                   |
| GAPDH        | Forward | 5'-AGAAGGCTGGGGCTCATTG-3'      | 258               |
|              | Reverse | 5'-AGGGGCCATCCACAGTCTTC-3'     |                   |
| YY1          | Forward | 5'-AAGTGGGAGCAGAAGCAGG-3'      | 297               |
|              | Reverse | 5'-GCCTTTATGAGGGCAAGCT-3'      |                   |
| ATG4B (ChIP) | Forward | 5'-AGAGGAGGAAGCGCCACCCAT-3'    | 183               |
|              | Reverse | 5'-CGCAGGCGGCGAAGACGATA-3'     |                   |
| YY1 (3'-UTR) | Forward | 5'-GAAGACCCTTCTCGACCACG-3'     | 356               |
|              | Reverse | 5'-TAAGCAACAGGTGAGCTTCATA-3'   |                   |

**Supplementary Table 2. Oligonucleotide sets used for constructs.**

| Oligo set            | Sequences                                                                                                                                                                 |
|----------------------|---------------------------------------------------------------------------------------------------------------------------------------------------------------------------|
| Ci-YY1 #1 Target     | 5'-ACCCTCTACATCGCCACGGACGG-3';                                                                                                                                            |
| Ci-YY1 #2 Target     | 5'-GATGTAGAGGGTGTGCCCCGAGG-3'                                                                                                                                             |
| Ca-YY1 #1 Target     | 5'-CGCTCGGCCGCTGCTCGTCTCGG-3';                                                                                                                                            |
| Ca-YY1 #2 Target     | 5'-CGGGCCCGAGCAGAGTGTGGCGG-3'                                                                                                                                             |
| Ci- ALKBH5 #1 Target | 5'-AGCTCTCCGCACGACGTCACGGG-3';                                                                                                                                            |
| Ci- ALKBH5 #2 Target | 5'-TGGCTGCCCGTGACGTCGTGCGG-3';                                                                                                                                            |
| Ca- ALKBH5 #1 Target | 5'-GTTTCGGACGATGCCGTGACGCGG-3'                                                                                                                                            |
| Ca- ALKBH5 #2 Target | 5'-ATATGAGCGCACCCCTGTAGAGG-3'                                                                                                                                             |
| Ci-ATG4B #1 Target   | 5'-CCGGCCGTACGCCAAAATGGCGG-3';                                                                                                                                            |
| Ci-ATG4B #2 Target   | 5'-GCGACGCCGCTCGGGTCAGTCGG-3';                                                                                                                                            |
| Ca-ATG4B #1 Target   | 5'-GCGCGCGAGCGGAAATACGCGGG-3'                                                                                                                                             |
| Ca-ATG4B #2 Target   | 5'-CAGCAACGCGACGCGGCGACGGG-3';                                                                                                                                            |
| Ci-FTO #1 Target     | 5'-CTAAATCCCGTGGCGCTCGCGGG-3';                                                                                                                                            |
| Ci-FTO #2 Target     | 5'-CGAGGGATCTACGCAGCTTGCGG-3'                                                                                                                                             |
| Ca-FTO #1 Target     | 5'-CTATAGCGCCGACAGCGTGGCGG-3'                                                                                                                                             |
| Ca-FTO #2 Target     | 5'-TATAGCGCCGACAGCGTGGCGGG-3'                                                                                                                                             |
| Ci-YTHDF1 #1 Target  | 5'-TCCTCAGTGCGTCCGCGTCCCGG-3';                                                                                                                                            |
| Ci-YTHDF1 #2 Target  | 5'-GGAGGCGTCTGACTCCAATGGCGG-3';                                                                                                                                           |
| Ca-YTHDF1 #1 Target  | 5'-GGTCCCAGTCTCGTGGCGGGGG-3'                                                                                                                                              |
| Ca-YTHDF1 #2 Target  | 5'-CGAAATCCATCCCGTAAGACGGG-3'                                                                                                                                             |
| pGL3-YY1 Reporter    | 5'-CCGGCCATCTTGATACGACCATCTTCT<br>ATCGGCCATCTTGATACGACCATGTTCA-3' (sense);<br><br>5'-AGCTTGAACATGGTTCGTATCAAGATGGCCGAT<br>AGAAGATGGTTCGTATCAAGATGGCCGGGTAC-3' (antisense) |

**Supplementary Table 3. Screening for transcription factors in autophagy.**

| Autophagy related genes                         |          |          |           |          |          |          |          |
|-------------------------------------------------|----------|----------|-----------|----------|----------|----------|----------|
| AMBRA1                                          | BCL2L1   | CHMP2B   | FADD      | IKBKE    | MYC      | PTEN     | TBK1     |
| APOL1                                           | BECN1    | CHMP4B   | FAM48A    | IL24     | NAF1     | PTK6     | TM9SF1   |
| ARNT                                            | BID      | CLN3     | FAS       | IRGM     | NAMPT    | RAB11A   | TMEM49   |
| ARSA                                            | BIRC5    | CTSB     | FKBP1A    | ITGA3    | NBR1     | RAB1A    | TMEM74   |
| ARSB                                            | BIRC6    | CTSD     | FKBP1B    | ITGA6    | NCKAP1   | RAB24    | TNFSF10  |
| ATF4                                            | BNIP1    | CTSL1    | FOS       | ITGB1    | NFE2L2   | RAB33B   | TP53     |
| ATF6                                            | BNIP3    | CX3CL1   | FOXO1     | ITGB4    | NFKB1    | RAB5A    | TP53INP2 |
| ATG10                                           | BNIP3L   | CXCR4    | FOXO3     | ITPR1    | NKX2-3   | RAB7A    | TP63     |
| ATG12                                           | C12orf44 | DAPK1    | GAA       | KIAA0226 | NLRC4    | RAC1     | TP73     |
| ATG16L1                                         | C17orf88 | DAPK2    | GABARAP   | KIAA0652 | NPC1     | RAF1     | TSC1     |
| ATG16L2                                         | CALCOCO2 | DDIT3    | GABARAPL1 | KIAA0831 | NRG1     | RB1      | TSC2     |
| ATG2A                                           | CAMKK2   | DIRAS3   | GABARAPL2 | KIF5B    | NRG2     | RB1CC1   | TUSC1    |
| ATG2B                                           | CANX     | DLC1     | GAPDH     | KLHL24   | NRG3     | RELA     | ULK1     |
| ATG3                                            | CAPN1    | DNAJB1   | GNAI3     | LAMP1    | P4HB     | RGS19    | ULK2     |
| ATG4A                                           | CAPN10   | DNAJB9   | GNB2L1    | LAMP2    | PARK2    | RHEB     | ULK3     |
| ATG4B                                           | CAPN2    | DRAM1    | GOPC      | MAP1LC3A | PARP1    | RPS6KB1  | USP10    |
| ATG4C                                           | CAPNS1   | EDEM1    | GRID1     | MAP1LC3B | PEA15    | RPTOR    | UVRAG    |
| ATG4D                                           | CASP1    | EEF2     | GRID2     | MAP1LC3C | PELP1    | SAR1A    | VAMP3    |
| ATG5                                            | CASP3    | EEF2K    | HDAC1     | MAP2K7   | PEX14    | SERPINA1 | VAMP7    |
| ATG7                                            | CASP4    | EGFR     | HDAC6     | MAPK1    | PEX3     | SESN2    | VEGFA    |
| ATG9A                                           | CASP8    | EIF2AK2  | HGS       | MAPK3    | PIK3C3   | SH3GLB1  | WDFY3    |
| ATG9B                                           | CCL2     | EIF2AK3  | HIF1A     | MAPK8    | PIK3R4   | SIRT1    | WDR45    |
| ATIC                                            | CCR2     | EIF2S1   | HSP90AB1  | MAPK8IP1 | PINK1    | SIRT2    | WDR45L   |
| BAG1                                            | CD46     | EIF4EBP1 | HSPA5     | MAPK9    | PPP1R15A | SPHK1    | WIPI1    |
| BAG3                                            | CDKN1A   | EIF4G1   | HSPA8     | MBTPS2   | PRKAB1   | SPNS1    | WIPI2    |
| BAK1                                            | CDKN1B   | ERBB2    | HSPB8     | MLST8    | PRKAR1A  | SQSTM1   | ZFYVE1   |
| BAX                                             | CDKN2A   | ERN1     | IFNG      | MTMR14   | PRKCD    | ST13     |          |
| BCL2                                            | CFLAR    | ERO1L    | IKBKB     | MTOR     | PRKCQ    | STK11    |          |
| Transcription factors analysis from rcis target |          |          |           |          |          |          |          |
| ARID3A                                          | BHLHE40  | ELF2     | FEV       | KDM5A    | PITX3    | SREBF1   | ZFP42    |
| ARNT                                            | BHLHE41  | ELF4     | FLI1      | MAFK     | PML      | SREBF2   | ZKSCAN3  |
| ARNT2                                           | BPTF     | ELK1     | FOXD1     | MAX      | POLR2A   | TEAD4    | ZNF358   |
| ARNTL                                           | CEBPZ    | ELK3     | FOXD2     | MITF     | POU5F1   | TFE3     | ZNF362   |
| ARNTL2                                          | CREB1    | EP300    | FOXO3     | MLX      | RAD21    | TFEB     | ZNF384   |
| ATF2                                            | CREB3    | ERG      | FOXP1     | MLXIPL   | RELA     | TFEC     | ZNF454   |
| ATF3                                            | CREB3L1  | ETV2     | GABPA     | MYC      | SIN3A    | USF1     | ZNF513   |
| ATF4                                            | CREB3L2  | ETV4     | GTF2F1    | NFE2     | SP4      | USF2     | ZNF597   |
| BACH1                                           | CREB3L4  | ETV4     | HELT      | PAX4     | SPI1     | XBP1     | ZNF768   |
| BACH2                                           | CREM     | ETV6     | IRF3      | PITX1    | SPIB     | YY1      |          |
| BATF3                                           | ELF1     | ETV7     | JDP2      | PITX2    | SPIC     | YY2      |          |

| Transcription factors analysis BART |        |         |       |        |        |        |         |
|-------------------------------------|--------|---------|-------|--------|--------|--------|---------|
| AFF4                                | CDK8   | ELL2    | HSF1  | MAX    | PAF1   | SAP30  | TBP     |
| ATF1                                | CDK9   | EMSY    | INO80 | MAZ    | PHF2   | SIN3A  | TFDP1   |
| AUTS2                               | CHD1   | EPC1    | IRF1  | MED1   | PHF8   | SIX5   | U2AF1   |
| BCL11B                              | CHD4   | ERG     | IRF3  | MLLT1  | PHIP   | SMAD5  | UBTF    |
| BCL3                                | CPSF3L | ETS1    | KAT5  | MYC    | PML    | SP1    | XRN2    |
| BRCA1                               | CREB1  | FAM208A | KAT7  | MYCN   | POLR2A | SP2    | YY1     |
| BRD1                                | DCP1A  | FOXM1   | KDM2B | NCOR1  | POLR2B | SPIN1  | ZBTB11  |
| BRD2                                | DDX21  | GABPA   | KDM5A | NELFA  | RB1    | SRSF3  | ZBTB33  |
| BRD3                                | E2F1   | GLI2    | KDM5C | NELFE  | RBBP5  | STAT1  | ZBTB7A  |
| BRD4                                | E2F4   | GMEB2   | KLF15 | NFATC1 | RBL2   | STAT2  | ZNF143  |
| BRPF3                               | EGR1   | GTF2B   | KLF9  | NFYA   | RBP2   | SUPT5H | ZSCAN22 |
| CBFB                                | ELF1   | H2AZ    | KMT2A | NR2C2  | REL    | TAF1   |         |
| CD74                                | ELK1   | HCFC1   | KMT2D | NRF1   | RELA   | TAF3   |         |
| CDK7                                | ELK4   | HDAC1   | MAPK1 | OGT    | RPE    | TAFII  |         |

  

| Overlap |      |        |      |       |      |       |     |
|---------|------|--------|------|-------|------|-------|-----|
| CREB1   | ELF1 | ELK1   | ERG  | GABPA | IRF3 | KDM5A | MAX |
| MYC     | PML  | POLR2A | RELA | SIN3A | YY1  |       |     |

**Supplementary Table 4. Screening for YY1 target autophagy related genes (Figure 3A).**

| YY1 target autophagy related genes | YY1 related gene | Overlap |
|------------------------------------|------------------|---------|
| ARNT                               | MAPK9            | ARNT    |
| ATF4                               | NRG1             | ATG4B   |
| ATG4B                              | PRKAR1A          | GOPC    |
| BAX                                | RAB1A            | RAF1    |
| CDKN1B                             | RAB5A            |         |
| CDKN2A                             | RAB7A            |         |
| FKBP1B                             | RAF1             |         |
| FOXO1                              | RHEB             |         |
| GAPDH                              | RPTOR            |         |
| GOPC                               | SPNS1            |         |
| GRID2                              | STK11            |         |
| HIF1A                              | TSC1             |         |
| HSPA8                              | WDFY3            |         |
